# Supplementary material for: pH/temperature-sensitive hydrogel-based molecularly imprinted polymers (hydroMIPs) for drug delivery by frontal polymerization
Source: Royal Society of Chemistry journal article supplement (doi:10.1039/c6ra20626c), 2016-01-01
Supplement: c6ra20626c1.pdf [file c6ra20626c1.pdf]

## Electronic Supplementary Information (ESI)

### **pH/temperature-sensitive hydrogel-based molecularly imprinted polymers (hydroMIPs) for drug delivery by frontal polymerization**

Xiao-Ling Wang Hong-Fei Yao Xiu-Yuan Li Xu Wang Yan-Ping Huang\*  
Zhao-Sheng Liu

*Tianjin Key Laboratory on Technologies Enabling Development of Clinical  
Therapeutics and Diagnostics (Theranostics), School of Pharmacy, Tianjin Medical  
University, Tianjin 300070, China*

Correspondence: Prof. Yan-Ping Huang, School of Pharmacy, Tianjin Medical  
University, Tianjin 300070, China

**E-mail:** [huangyp100@163.com](mailto:huangyp100@163.com)

**Fax:** +86-22-23536746

**Keywords:** molecularly imprinted polymer; hydrogel; frontal polymerization; drug  
delivery; gatifloxacin

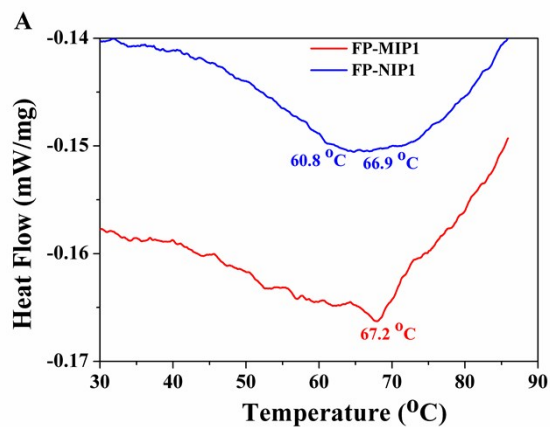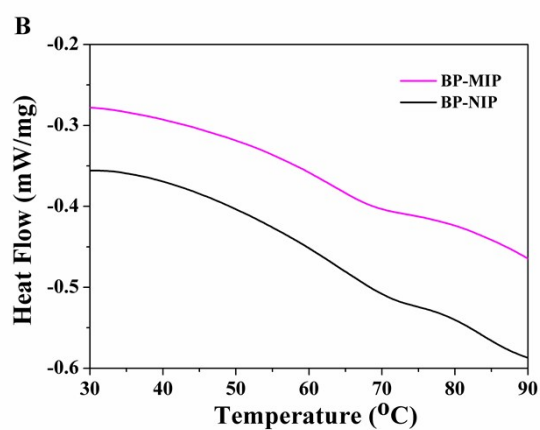

**Fig. S1.** DSC heating thermograms: A) FP based hydroMIP/NIP; B) BP based hydroMIP/NIP. Heating rates were 2 °C/min.

**Table S1** Parameters characterising the porous structure of hydrogel (calculated by mercury intrusion-extrusion porosimetry)

| Polymers | Total surface area<br>(m <sup>2</sup> /g) | Porosity<br>(%) | Mean pore diameter<br>(nm) | Median pore<br>diameter (nm) |
|----------|-------------------------------------------|-----------------|----------------------------|------------------------------|
| FP-MIP1  | 1.105                                     | 40.8            | 1283.4                     | 5387.6                       |
| FP-NIP1  | 15.124                                    | 14.3            | 38.9                       | 286.1                        |
| BP-MIP1  | 29.939                                    | 9.4             | 10.6                       | 50.4                         |
| BP-NIP1  | 35.984                                    | 18.0            | 17.7                       | 350.5                        |

**Table S2** Adsorption parameters of hydroMIPs with different amount of template

| Polymer | Amount of<br>template | $Q_m$<br>(mmol/g) | $K_L$<br>(L/mmol) | $R^2$ | IF   |
|---------|-----------------------|-------------------|-------------------|-------|------|
| MIP2    | 0.24                  | 1.448             | 0.756             | 0.980 | 1.04 |
| MIP1    | 0.48                  | 1.851             | 0.680             | 0.990 | 1.33 |
| MIP12   | 0.72                  | 1.452             | 0.945             | 0.986 | 1.04 |
| MIP13   | 0.96                  | 1.552             | 0.845             | 0.994 | 1.12 |

**Table S3** Adsorption parameters of hydroMIPs with different crosslinking degree

| Polymer | Crosslinking degree | $Q_m$<br>(mmol/g) | $K_L$<br>(L/mmol) | $R^2$ | IF   |
|---------|---------------------|-------------------|-------------------|-------|------|
| FP-MIP8 | 1‰                  | 2.359             | 0.441             | 0.946 | 0.89 |
| FP-NIP8 | 1‰                  | 2.641             | 0.287             | 0.958 |      |
| FP-MIP9 | 2‰                  | 1.821             | 0.617             | 0.982 | 1.00 |
| FP-NIP9 | 2‰                  | 1.651             | 0.741             | 0.977 |      |
| FP-MIP1 | 3.60‰               | 1.851             | 0.680             | 0.990 | 1.33 |
| FP-NIP1 | 3.60‰               | 1.391             | 0.825             | 0.991 |      |
| FP-MIP4 | 1%                  | 1.647             | 0.456             | 0.976 | 1.41 |
| FP-NIP4 | 1%                  | 1.164             | 0.887             | 0.981 |      |
| FP-MIP5 | 2%                  | 1.395             | 0.579             | 0.985 | 1.32 |
| FP-NIP5 | 2%                  | 1.059             | 0.811             | 0.979 |      |

**Table S4**

The amount of drug loaded, the entrapment efficiency, final release amount and time required achieving final release of the FP-based hydroMIPs and hydroNIPs loading through in three different soaking solutions.

| Soaking solution ( $\mu\text{g/mL}$ ) | FP-based hydrogel | Amount of drug loaded (mg/g) | Entrapment efficiency (%) | Final release (%) | Time to Final release (h) |
|---------------------------------------|-------------------|------------------------------|---------------------------|-------------------|---------------------------|
| 75                                    | MIP               | 16.9                         | 84.5                      | 45.0              | 14.5                      |
|                                       | NIP               | 18.1                         | 90.5                      | 90.5              | 7.0                       |
| 100                                   | MIP               | 8.9                          | 44.5                      | 98.1              | 10.3                      |
|                                       | NIP               | 9.1                          | 45.5                      | 57.9              | 1.0                       |
| 150                                   | MIP               | 8.9                          | 44.5                      | 98.1              | 10.3                      |
|                                       | NIP               | 9.1                          | 45.5                      | 57.9              | 1.0                       |

**Table S5**

Pharmacokinetic analyses in Wistar rats following intragastric administration.

|             | $T_{\max}$ (h) | $C_{\max}$ (ng/mL) | $AUC_{0-12}$<br>(ng mL <sup>-1</sup> h) |
|-------------|----------------|--------------------|-----------------------------------------|
| FP-hydroMIP | 1.5            | 29.9               | 220.9                                   |
| BP-hydroMIP | 2              | 37.3               | 131.1                                   |
| FP-hydroNIP | 3              | 20.1               | 56.7                                    |
